# Supplementary material for: Maternal and Perinatal Outcome in a Contemporary Cohort of Patients with Portal Hypertension: A Single-Center Experience
Source: MDPI journal article supplement (doi:10.3390/jcm12093088), 2023-04-24
Supplement: s1 [file s1]

| Case | Age | G | P | Etiology/Underlying cause                                      | Child Pugh Score/ALBI Score | Prior complications                                 | Varices                  | Platelet count | Medication                             |
|------|-----|---|---|----------------------------------------------------------------|-----------------------------|-----------------------------------------------------|--------------------------|----------------|----------------------------------------|
| 1    | 38  | 4 | 3 | Fascioliasis, schistosomiasis, portal vein thrombosis; ID 2018 | A/Grade 2                   | Cholestasis, variceal bleeding, splenectomy         | Grade I                  | Normal         | Rivaroxaban/Carvedilol                 |
| 2    | 20  | 2 | 1 | Budd Chiari (nicotin/pregnancy); ID 2016                       | A/Grade 1                   | Splenic infarction                                  | Gastric varices          | Normal         | LMWH                                   |
| 3    | 27  | 1 | 0 | Budd Chiari (May-Thurner Syndrom); ID 2018                     | A/Grade 1                   | LCIV thrombosis                                     | Unknown                  | 119            | LMWH                                   |
| 4    | 30  | 1 | 0 | Budd Chiari (COC, heterozygous FVL); ID 2011                   | A/Grade 1                   | Pulmonary embolism                                  | Grade III                | 123            | LMWH                                   |
| 5    | 38  | 3 | 0 | Budd Chiari (COC, thrombocythemia) ID 1999                     | A/Grade 1                   | Ascites, TIPS                                       | Grade II/Gastric varices | Normal         | LMWH, Fondaparinux                     |
| 6    | 27  | 1 | 0 | Portal vein thrombosis; ID 2000                                | A/Grade 1                   | Splenomegaly                                        | Grade III                | 85             | LMWH, Propranolol                      |
| 7    | 44  | 1 | 0 | Cirrhosis (AIH); ID 1998                                       | A/Grade 2                   | Splenic artery aneurysm                             | Grade I                  | 24             | Azathioprin, Prednisolone, Propranolol |
| 8    | 24  | 1 | 0 | Cirrhosis (AIH); ID 2014                                       | n.a.                        | None                                                | Grade I                  | 102            | Prednisolone                           |
| 9    | 38  | 2 | 1 | Cirrhosis (alcoholic); ID 2016                                 | C/Grade 1                   | Hydropic decompensation, variceal bleeding (rectal) | Grade I                  | 50             | Propranolol                            |
| 10   | 37  | 4 | 2 | Cirrhosis (alcoholic); ID 2015                                 | C/Grade 2                   | Hydropic decompensation, variceal bleeding          | Grade III                | 67             | None                                   |
| 11   | 30  | 3 | 1 | Cirrhosis (alcoholic); ID 2012                                 | A/Grade 1                   | Variceal bleeding                                   | None                     | Normal         | Clonazepam, Levomethadon               |

**Table S1 – Maternal baseline variables in eleven cases of portal hypertension in pregnancy.** Abbreviations: AIH: autoimmune hepatitis; ALBI score: albumin–bilirubin score; COC: combined oral contraceptive; FVL: Factor V Leiden heterozygous; ID: initial diagnosis; LMWH: low-molecular-weight heparin; n.a.: not available

| Case | GA at delivery | Mode of delivery      | Indication                | Blood loss (mL) | Complications                                                          | Newborn weight (percentile) | NICU | Indication for NICU admission               | Follow- up in months | Maternal outcome at last follow- up         |
|------|----------------|-----------------------|---------------------------|-----------------|------------------------------------------------------------------------|-----------------------------|------|---------------------------------------------|----------------------|---------------------------------------------|
| 1    | 31             | CD                    | PPROM, underlying disease | 2200            | Ascites, postoperative hemorrhage                                      | 75                          | yes  | Respiratory failure                         | 15                   | Biliary sepsis 11 months post-partum        |
| 2    | 37             | NVD (IoL)             | Underlying disease        | 400             | None                                                                   | 24                          | no   |                                             | 27                   | Stable disease                              |
| 3    | 38             | CD                    | Underlying disease        | 500             | None                                                                   | 32                          | yes  | Respiratory failure                         | 9                    | 2 months post-partum iliac stent thrombosis |
| 4    | 39             | CD                    | Underlying disease        | 800             | GA 22 variceal ligation                                                | 31                          | no   |                                             | 48                   | Stable disease                              |
| 5    | 28             | CD                    | Abnormal NST and Doppler  | 400             | Subclavian thrombosis, TIPS occlusion, ascites, newly occurred varices | 64                          | yes  | RDS, neonatal cardiac failure, infection    | 19                   | Death 19 months post-partum                 |
| 6    | 40             | Instrumental delivery | Underlying disease        | 300             | None                                                                   | 35                          | no   |                                             | 65                   | Stable disease                              |
| 7    | 34             | CD                    | Abnormal fetal Doppler    | 900             | ICP                                                                    | 24                          | yes  | Respiratory failure, Infection, hypotension | 36                   | Stable disease                              |
| 8    | 35             | CD                    | Abnormal NST              | 500             | ICP                                                                    | 73                          | no   |                                             | 95                   | Stable disease                              |
| 9    | 35             | CD                    | Preeclampsia              | 900             | Preeclampsia                                                           | 11                          | no   |                                             | 30                   | Death 30 months post-partum                 |
| 10   | 33             | Emergency CD          | Variceal bleeding         | 2500            | variceal ligation induced ulcer bleeding                               | 41                          | yes  | RDS, sepsis                                 | 8                    | Stable disease                              |
| 11   | 37             | NVD (IoL)             | Underlying disease        | 150             | None                                                                   | 9                           | no   |                                             | 8                    | Relapse (alcohol use)                       |

**Table S2 – Maternal and perinatal outcomes in eleven cases of portal hypertension in pregnancy.** Abbreviations: CD: cesarean delivery; GA: gestational age; ICP: intrahepatic cholestasis of pregnancy; IoL: induction of labor; LCIV: left common iliac vein; NST: nonstress test; NICU: neonatal intensive care unit; NVD: normal vaginal delivery; PPROM: preterm premature rupture of membranes; RDS: respiratory distress syndrome; TIPS: transjugular intrahepatic portosystemic shunt
